# Supplementary material for: Synthesis of interconnected mesoporous ZnCo2O4 nanosheets on a 3D graphene foam as a binder-free anode for high-performance Li-ion batteries
Source: Royal Society of Chemistry journal article supplement (doi:10.1039/c8ra05035j), 2018-01-01
Supplement: c8ra05035j1.pdf [file c8ra05035j1.pdf]

# Synthesis of interconnected mesoporous $\text{ZnCo}_2\text{O}_4$ nanosheets on a 3D Graphene foam as a binder-free anode for high- performance Li-ion batteries

Xu Wang<sup>a</sup>, Qi Chen<sup>a</sup>, Miao Wang<sup>a,\*</sup>

a. Department of Physics, Zhejiang University, Hangzhou 310027, P. R. China

\*Corresponding author. miaowang@zju.edu.cn

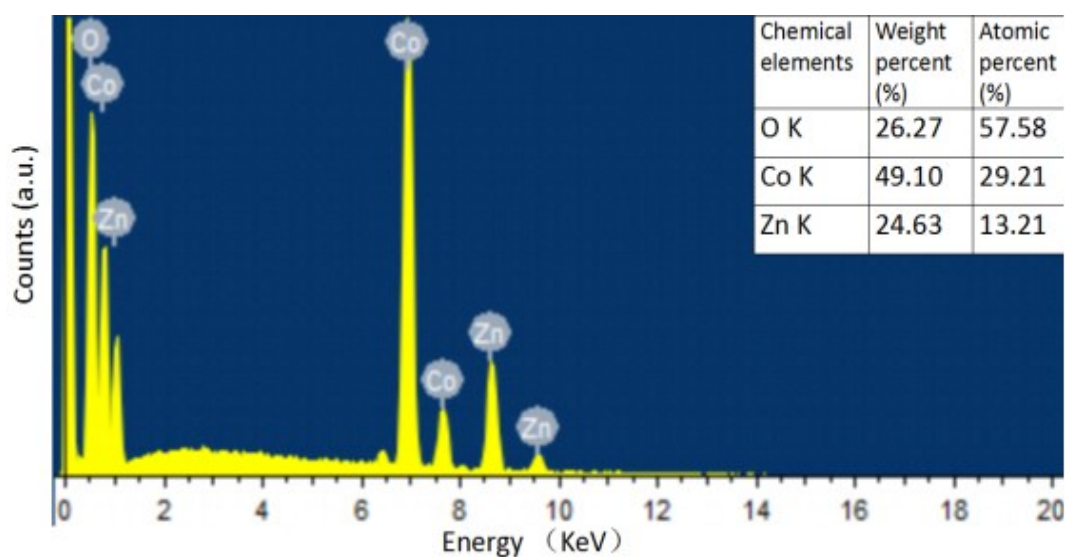

Fig.S1 EDS image of  $\text{ZnCo}_2\text{O}_4$  nanosheet arrays scraped from 3DGF@NF substrate.

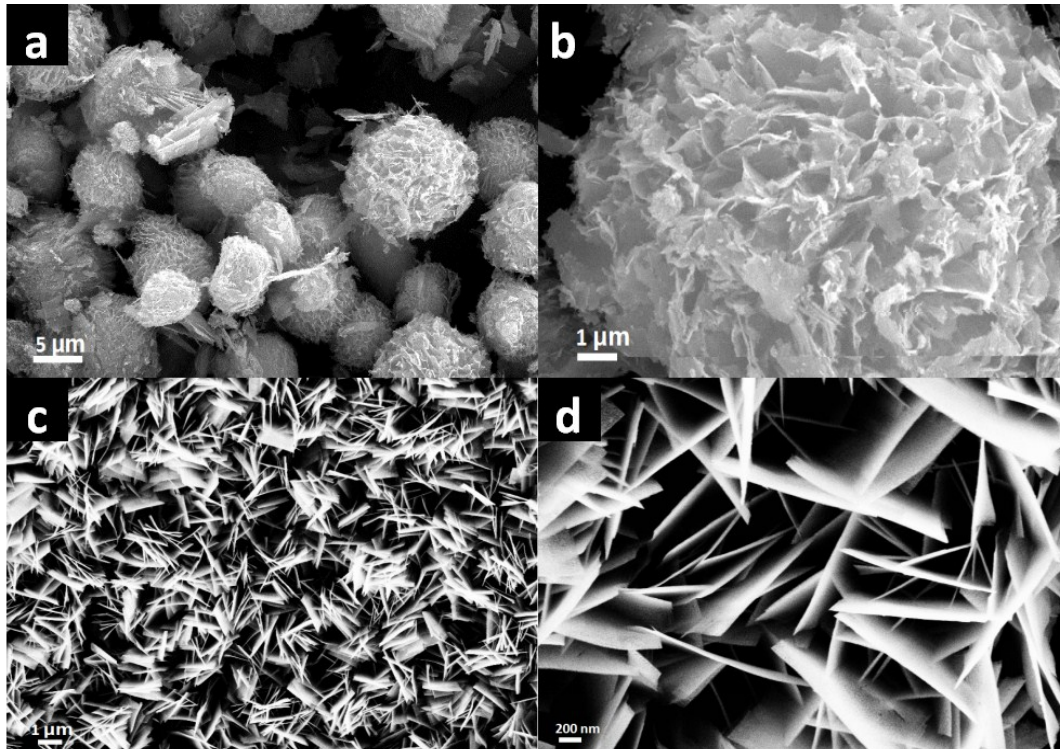

Fig.S2 SEM images of (a-b) ZnCo<sub>2</sub>O<sub>4</sub> powders and (c-d) ZnCo<sub>2</sub>O<sub>4</sub>@NF at different magnifications.

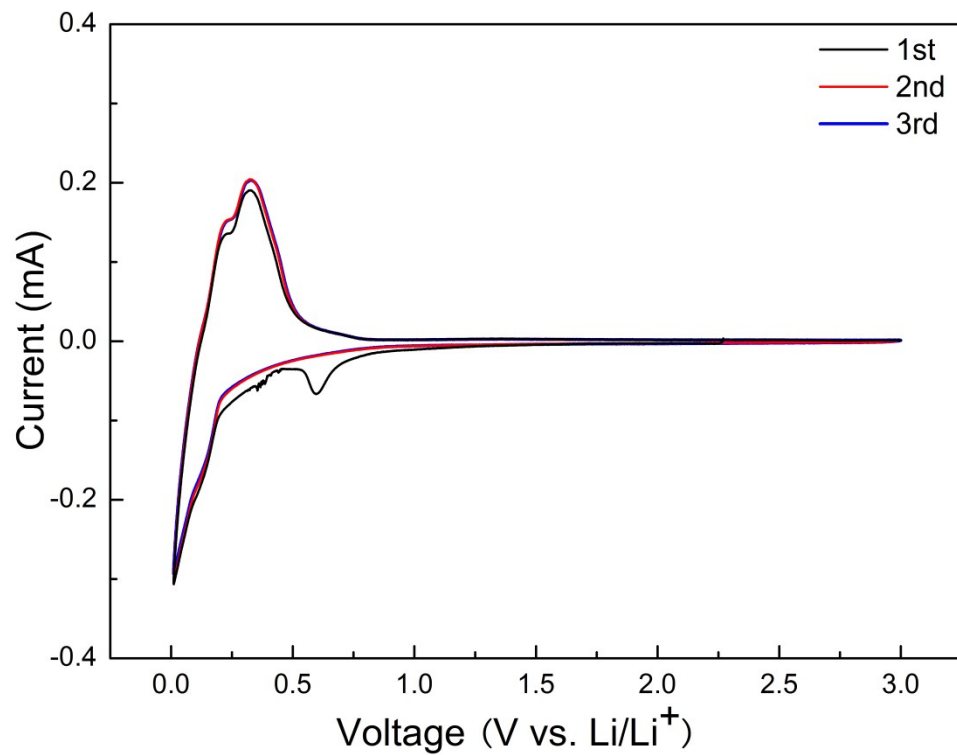

Fig.S3 CV curves of the pure 3DGF@NF electrode for the initial three cycles at a scan rate of 0.5 mV s<sup>-1</sup> in the voltage range of 0.01-3.0 V.

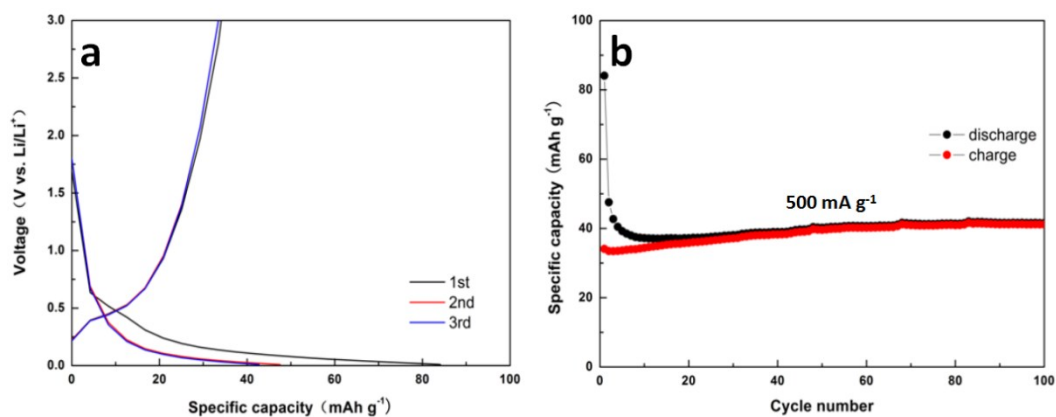

**Fig.S4 (a) Galvanostatic charge-discharge voltage profiles of the pure 3DGF@NF electrode for the first three cycles at a current of 500 mA g<sup>-1</sup>; (b) Cycling performance of the pure 3DGF@NF electrode at the current density of 500 mA g<sup>-1</sup>.**

**TableS1. Comparison of Li-ion electrochemical performance of ZnCo<sub>2</sub>O<sub>4</sub> based electrodes.**

| Materials                                                                          | Current density<br>(mA g <sup>-1</sup> ) | Capacity<br>(mAh g <sup>-1</sup> ) | Cycle number | Initial efficiency | Ref. |
|------------------------------------------------------------------------------------|------------------------------------------|------------------------------------|--------------|--------------------|------|
| Co <sub>3</sub> O <sub>4</sub> /ZnCo <sub>2</sub> O <sub>4</sub><br>hollow spheres | 230                                      | 934                                | 300          | 65%                | 1    |
| ZnCo <sub>2</sub> O <sub>4</sub> /graphene                                         | 90                                       | 1124.8                             | 90           | 65%                | 2    |
| ZnO/ZnCo <sub>2</sub> O <sub>4</sub>                                               | 500                                      | 730                                | 150          | 63.7%              | 3    |
| ZnCo <sub>2</sub> O <sub>4</sub> film/Ni foam                                      | 400                                      | 1726                               | 100          | 76%                | 4    |
| Zn-Co-O/C                                                                          | 1000                                     | 991.7                              | 200          | 77.8%              | 5    |
|                                                                                    | 4000                                     | 823.4                              | 1000         | —                  |      |
| ZnCo <sub>2</sub> O <sub>4</sub> /rGO/CNTs                                         | 500                                      | 1026.6                             | 200          | 74.3%              | 6    |
| ZnCo <sub>2</sub> O <sub>4</sub> /rGO/Ni foam                                      | 100                                      | 1208                               | 100          | 70.4%              | 7    |
|                                                                                    | 500                                      | 1032                               | 100          | 65.5%              |      |
| ZnCo <sub>2</sub> O <sub>4</sub> /Carbon cloth                                     | 200                                      | 1200                               | 160          | —                  | 8    |

|                                                            |      |      |     |       |           |
|------------------------------------------------------------|------|------|-----|-------|-----------|
| ZnCo <sub>2</sub> O <sub>4</sub> /Ni foam                  | 500  | 1100 | 50  | 73.5% | 9         |
| ZnCo <sub>2</sub> O <sub>4</sub> nanoflakes/Ni foam        | 1000 | 1138 | 500 | —     | 10        |
| ZnCo <sub>2</sub> O <sub>4</sub> nanoribbon arrays/Ni foam | 200  | 1422 | 80  | 81%   | 11        |
| ZnCo <sub>2</sub> O <sub>4</sub> @3DGF@NF                  | 500  | 1223 | 240 | 55%   | This work |

1. Q. Wang, B. Yu, X. Li, L. Xing and X. Xue, *J. Mater. Chem. A*, 2016, **4**, 425-433.
2. A. K. Rai and J. Kim, *Solid State Sci.*, 2015, **48**, 90-96.
3. M. Zhen, X. Zhang and L. Liu, *RSC Adv.*, 2016, **6**, 43551-43555.
4. J. Yuan, C. Chen, Y. Hao, X. Zhang, S. Gao, R. Agrawal, C. Wang, Z. Xiong, H. Yu and Y. Xie, *J. Electroanal. Chem.*, 2017, **787**, 158-162.
5. C. Ding, X. Jiang, X. Huang, H. Zhang, W. Zhong, Y. Xia and C. Dai, *J. Alloys Compd.*, 2018, **736**, 181-189.
6. Z. Wang, Q. Ru, Y. Mo, L. Guo, X. Chen, X. Hou and S. Hu, *J. Mater. Sci.- Mater. Electro.*, 2017, **28**, 9081-9090.
7. Y. Wang, Y. Zhang, J. Ou, Q. Zhao, M. Liao and D. Xiao, *RSC Adv.*, 2016, **6**, 547-554.
8. B. Liu, J. Zhang, X. Wang, G. Chen, D. Chen, C. Zhou and G. Shen, *Nano Lett.*, 2012, **12**, 3005-3011.
9. B. Qu, L. Hu, Q. Li, Y. Wang, L. Chen and T. Wang, *ACS Appl. Mater. Interfaces*, 2014, **6**, 731-736.
10. X. Hou, S. Bai, S. Xue, X. Shang, Y. Fu and D. He, *J. Alloys Compd.*, 2017, **711**, 592-597.
11. Z. Zhang, X. Zhang, Y. Feng, X. Wang, Q. Sun, D. Yu, W. Tong, X. Zhao and X. Liu, *Electrochim. Acta*, 2018, **260**, 823-829.
